# Supplementary material for: Digital Mental Health Service Engagement Changes during Covid-19 in Children and Young People across the UK: Presenting Concerns, Service Activity, and Access by Gender, Ethnicity, and Deprivation
Source: Preprints.org preprint supplement (doi:10.20944/preprints202302.0017.v1), 2023-02-02
Supplement: Supplementary file 1 [file supplementary]

# Supplementary Materials:

**Table S1G.** The proportion of research consent response relative to gender in the digital service.

|              | No consented (%) | Consented (%) |
|--------------|------------------|---------------|
| Agender      | 43.87            | 56.13         |
| Female       | 43.24            | 56.76         |
| Gender Fluid | 42.66            | 57.34         |
| Male         | 38.89            | 61.11         |
| Total        | 42.29            | 57.71         |

**Table S1E.** The proportion of research consent response relative to ethnicity in the digital service.

|                                              | No consented (%) | Consented (%) |
|----------------------------------------------|------------------|---------------|
| White                                        | 40.97            | 59.03         |
| Black / African/ Caribbean/<br>Black British | 42.73            | 57.26         |
| Asian/Asian British                          | 48.04            | 51.96         |
| Mixed/Multiple ethnic<br>groups              | 41.51            | 58.49         |
| Not Stated/Other                             | 55.81            | 44.19         |
| Total                                        | 42.29            | 57.71         |

**Table S2.** Presenting concerns frequency and categorization for the study based on previous literature on Covid-19 mental health impact studies.

| Studies                                                              | Codes    | Categories <sup>1</sup>                      | Presenting concerns   | Frequency |
|----------------------------------------------------------------------|----------|----------------------------------------------|-----------------------|-----------|
| Son, Hedge, Smith,<br>Wang &<br>Sasangohar., 2020 <sup>29</sup>      | External | School or home related issue                 | Family Relationships  | 11250     |
|                                                                      | External | School or home related issue                 | Friendships           | 9272      |
|                                                                      | External | School or home related issue                 | School/College issues | 4741      |
|                                                                      | External | School or home related issue                 | Bullying              | 4636      |
|                                                                      | External | School or home related issue                 | Bereavement           | 3547      |
|                                                                      | MH_2     | Mental health/emotional difficulties         | Anxiety/Stress        | 24036     |
|                                                                      | MH_2     | Mental health/emotional difficulties         | Self-Worth            | 6495      |
|                                                                      | MH_2     | Mental health/emotional difficulties         | Depression            | 6394      |
|                                                                      | MH_2     | Mental health/emotional difficulties         | Eating Difficulties   | 4095      |
|                                                                      | MH_2     | Mental health/emotional difficulties         | Sadness               | 3989      |
| Ford, John &<br>Gunnell., 2021 <sup>30</sup>                         | PhyOth   | Physical or other issue                      | Illness (own)         | 1037      |
|                                                                      | PhyOth   | Physical or other issue                      | Weight Issues         | 723       |
|                                                                      | PhyOth   | Physical or other issue                      | Illness (other)       | 720       |
|                                                                      | PhyOth   | Physical or other issue                      | Access to resources   | 655       |
|                                                                      | PhyOth   | Physical or other issue                      | Teenage Pregnancy     | 351       |
| Taggart, Rouf,<br>Hisham, Duckworth<br>& Sweeney, 2021 <sup>31</sup> | Rsk_2    | Risk / Abuse /Safeguarding risk              | Trauma                | 1672      |
|                                                                      | Rsk_2    | Risk / Abuse /Safeguarding risk              | Sexual Abuse          | 1297      |
|                                                                      | Rsk_2    | Risk / Abuse /Safeguarding risk              | CSE                   | 887       |
|                                                                      | Rsk_2    | Risk / Abuse /Safeguarding risk              | Emotional Abuse       | 724       |
|                                                                      | Rsk_2    | Risk / Abuse /Safeguarding risk              | Physical Abuse        | 568       |
|                                                                      |          | Suicidality / Self Harm / Maladaptive coping |                       |           |
|                                                                      | SSMal_2  |                                              | Self-Harm             | 12185     |

|                                                                                                          |         |                                              |                    |       |
|----------------------------------------------------------------------------------------------------------|---------|----------------------------------------------|--------------------|-------|
| Taquet, Luciano,<br>Geddes & Harrison,<br>2021 <sup>32</sup><br>Findaly & Gilmore,<br>2020 <sup>33</sup> | SSMal_2 | Suicidality / Self Harm / Maladaptive coping | Suicidal Thoughts  | 10776 |
|                                                                                                          | SSMal_2 | Suicidality / Self Harm / Maladaptive coping | Substance Misuse   | 478   |
|                                                                                                          | SSMal_2 | Suicidality / Self Harm / Maladaptive coping | Alcohol (self)     | 340   |
|                                                                                                          | SSMal_2 | Suicidality / Self Harm / Maladaptive coping | Criminal Behaviour | 109   |

<sup>1</sup> Tables shows the top 5 presenting concerns in each category only
